# Supplementary material for: The pore surface diffusion model as a tool for rapid screening of novel nanomaterial-enhanced hybrid ion-exchange media
Source: Royal Society of Chemistry journal article supplement (doi:10.1039/c5ew00108k), 2015-01-01
Supplement: c5ew00108k1.pdf [file c5ew00108k1.pdf]

### Supplemental information

Initial estimates for the film mass transport coefficient ( $k_f$ ) were based on the Gnielinski correlation <sup>23</sup>:

$$k_f = \frac{[1 + 1.5(1 - \varepsilon)] \times D_l}{d_p} \times \left( 2 + 0.644 \times \text{Re}^{1/2} \times \text{Sc}^{1/3} \right) \quad (\text{Equation S.1})$$

$$\text{Re} = \frac{\rho_l \times \Phi \times d_p \times v_l}{\varepsilon \times \mu_l} \quad (\text{Equation S.2})$$

$$\text{Sc} = \frac{\mu_l}{\rho_l \times D_l} \quad (\text{Equation S.3})$$

Constraints:  $\text{Re} \times \text{Sc} > 500$ ;  $0.6 \leq \text{Sc} \leq 10^4$ ;  $1 \leq \text{Re} < 100$ ;  $0.26 < \varepsilon < 0.935$

where  $k_f \equiv$  the film mass transport coefficient (calculated  $k_f \approx 4.36 \times 10^{-3} \text{ m s}^{-1}$  for arsenate and  $k_f \approx 5.23 \times 10^{-3} \text{ m s}^{-1}$  for nitrate); Re is the Reynolds number (unitless); Sc is the Schmidt number (unitless);  $d_p$  is the adsorbent particle diameter ( $d_p = 0.700 \times 10^{-3} \text{ m}$ );  $D_l$  is the free liquid diffusivity for arsenate or nitrate ( $D_{l-\text{As}} = 9.05 \times 10^{-10} \text{ m}^2 \text{ s}^{-1}$ ;  $D_{l-\text{NO}_3} = 1.90 \times 10^{-9} \text{ m}^2 \text{ s}^{-1}$ ) <sup>38, 39</sup>;  $\varepsilon$  is the bed void fraction ( $\varepsilon = 0.634$ );  $\mu_l$  is the dynamic viscosity of water at 20 °C ( $1.002 \times 10^{-3} \text{ N s m}^{-2}$ );  $\rho_l$  is the density of water at 20 °C ( $\rho_l = 998.2 \text{ kg m}^{-3}$ );  $\Phi$  is the sphericity of the particle ( $\Phi = 1$ ); and  $v_l$  is the liquid superficial velocity ( $v_l \approx 0.00208 \text{ m s}^{-1}$ ).

Considering that the material was very porous (the particle porosity  $\varepsilon_p \approx 0.75$ ), the impact of surface diffusion was assumed to be negligible. As suggested by Sontheimer et al. <sup>38</sup>, the pore diffusion coefficient was estimated using Equation S.4:

$$D_p = \frac{\varepsilon_p \times D_l}{\tau} \quad (\text{Equation S.4})$$

The tortuosity was estimated using the correlation suggested by Mackie and Meares (Equation S.5) for electrolyte solutions <sup>40</sup>:

$$\tau = \frac{(2 - \varepsilon_p)^2}{\varepsilon_p} \quad (\text{Equation S.5})$$

where  $\tau$  is the tortuosity factor and  $\varepsilon_p$  is the particle porosity ( $\varepsilon_p \approx 0.75$ ). The estimated tortuosity value was  $\tau \approx 2.1$ . The estimated value for the pore diffusion coefficients were  $D_{P-As} \approx 3.5 \times 10^{-6} \text{ cm}^2 \text{ s}^{-1}$  for arsenate and  $D_{P-NO_3} \approx 6.85 \times 10^{-6} \text{ cm}^2 \text{ s}^{-1}$ .

The model breakthrough predictions were compared with the experimental data. Correlations between the model predictions and experimental data characterized by  $R^2 > 0.9$  were considered to be sufficient for hypothesis validation.

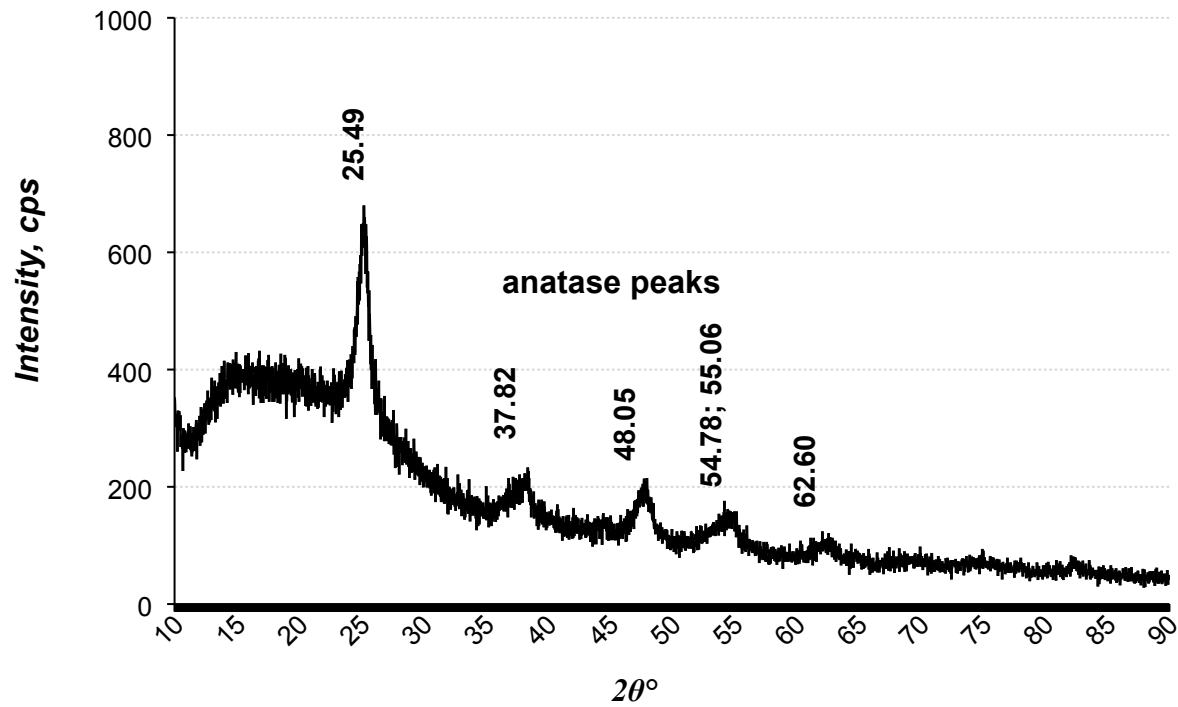

**Figure S1.** X-ray diffraction peaks indicate existence of anatase crystalline structure of the synthesized titanium dioxide nanoparticles within the hybrid ion-exchange media.

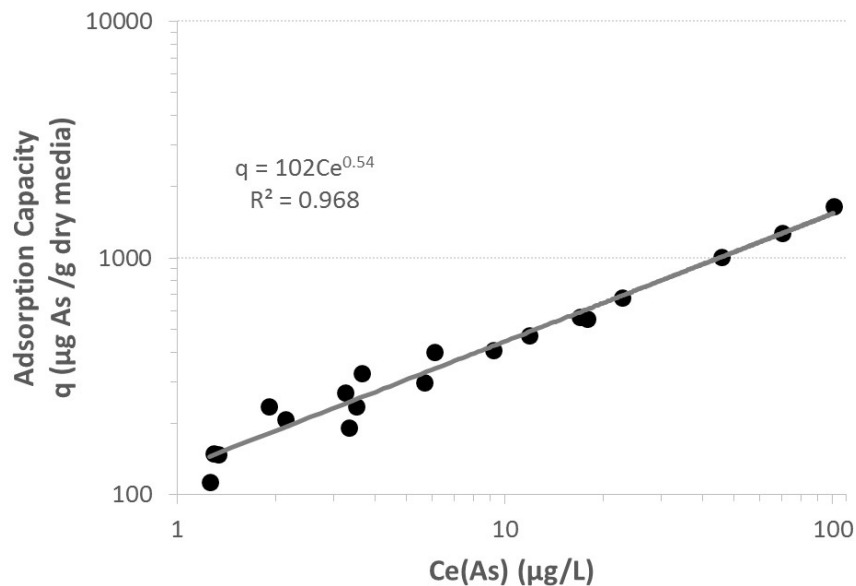

**Figure S2.** Arsenic sorption isotherms for the Ti-HIX media in 5 mM  $\text{NaHCHO}_3$  buffered ultrapure water at final  $\text{pH} = 7.2 \pm 0.3$  and contact time of 3 days ;( $C_0 \approx 108 \mu\text{g L}^{-1} \text{As}$ )

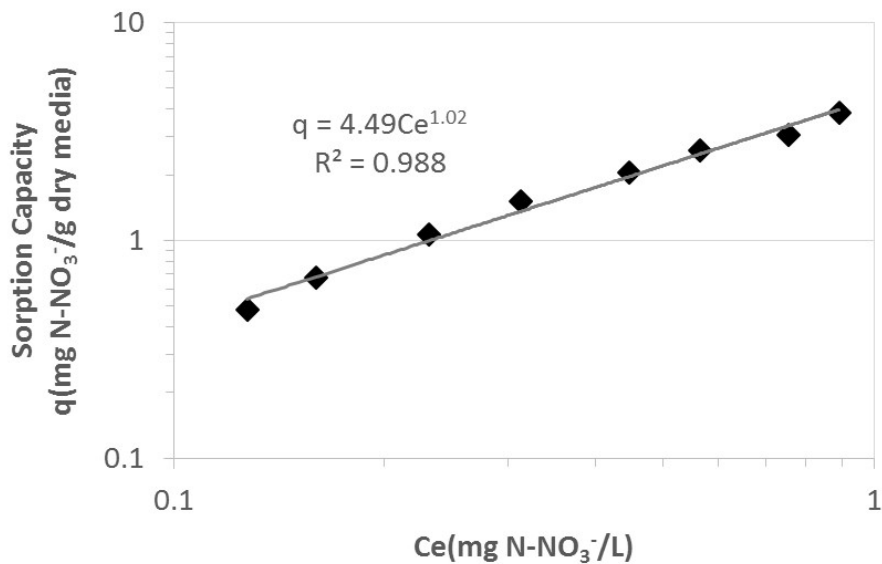

**Figure S3.** Nitrate sorption isotherms for the Ti-HIX media in 5 mM  $\text{NaHCHO}_3$  buffered ultrapure water at final  $\text{pH} = 7.2 \pm 0.3$  and contact time of 3 days; ( $C_0 \approx 1.1 \text{ mg L}^{-1} \text{N-NO}_3^-$ ).

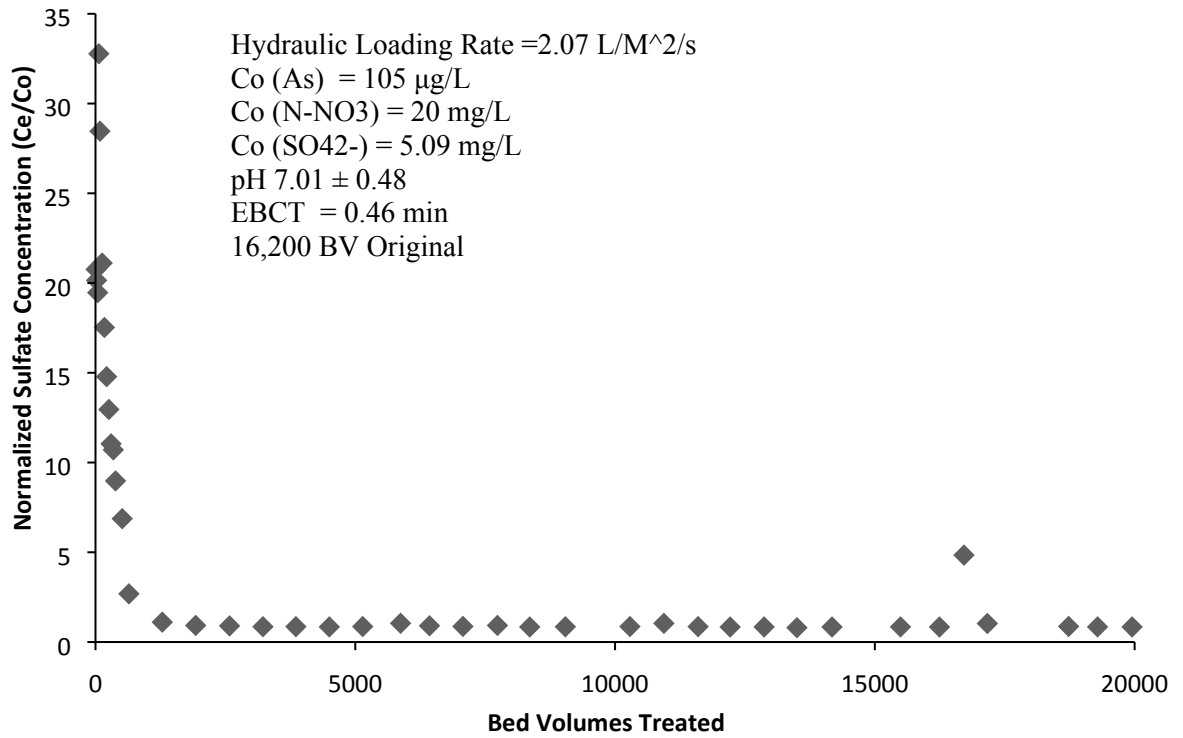

**Figure S4.** Sulfate breakthrough curves for titanium dioxide nanomaterial-enhanced hybrid ion exchange media under continuous flow regime.
